# Supplementary material for: Strong isoprene emission response to temperature in tundra vegetation
Source: PubMed Central journal article supplement — Proc Natl Acad Sci U S A. 2022 Sep 12;119(38):e2118014119. doi: 10.1073/pnas.2118014119 (PMC9499559; doi:10.1073/pnas.2118014119), 2022-09-12
Supplement: pnas.2118014119.sapp.pdf [file pnas.2118014119.sapp.pdf]

## **Supplementary Information for** Strong isoprene emission response to temperature in tundra vegetation

Roger Seco, Thomas Holst, Cleo L. Davie-Martin, Tihomir Simin, Alex Guenther, Norbert Pirk, Janne Rinne, Riikka Rinnan

Roger Seco  
Email: [email@rogerseco.cat](mailto:email@rogerseco.cat)

Riikka Rinnan  
Email: [riikkar@bio.ku.dk](mailto:riikkar@bio.ku.dk)

### **This PDF file includes:**

Figures S1 to S4  
Tables S1 to S2  
SI References

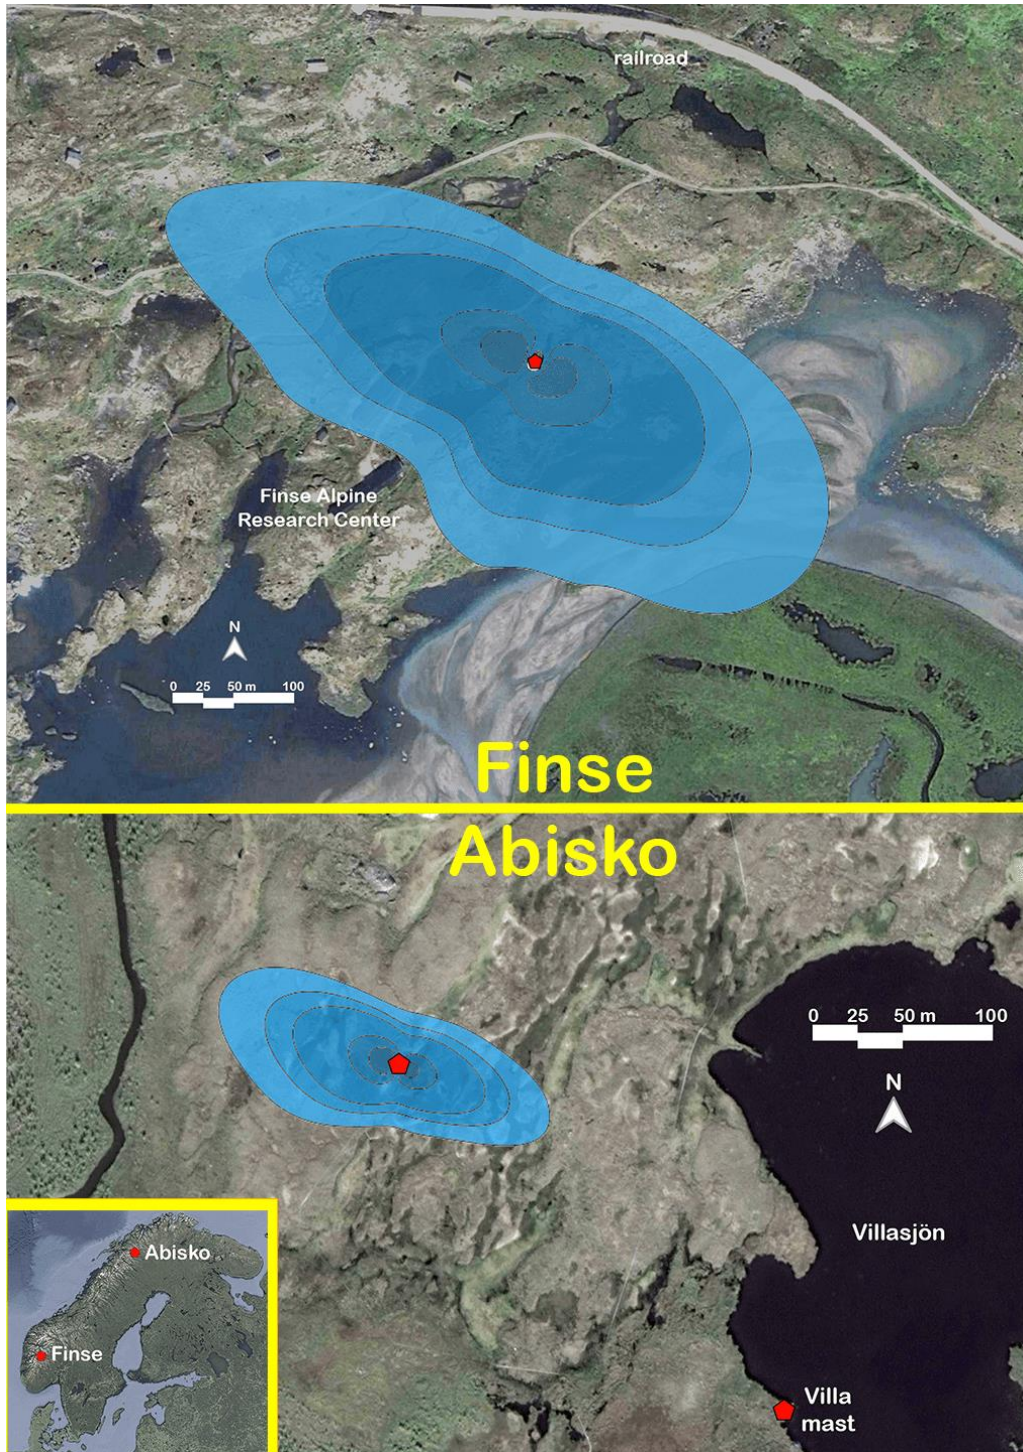

**Fig. S1.** Top: Map of the Finse study area, showing our EC tower (red-filled pentagon) nearby the Finse Alpine Research Center.

Bottom: Map of the Abisko Stordalen Mire study area, showing our EC tower at the ICOS Stordalen station (SE-Sto) and the nearby Villa mast (see Seco et al., 2020, for another EC study at the Villa mast) by the shore of Villasjön. The inset map shows the location of the sites within Scandinavia.

The blue shaded area represents the combined footprint for the whole season of EC measurements, at flux contribution intervals of 85%, 80%, 75%, 50%, and 25%. Note the different scales of the maps. The base map images are © Google Earth (images provided by DigitalGlobe and Maxar Technologies).

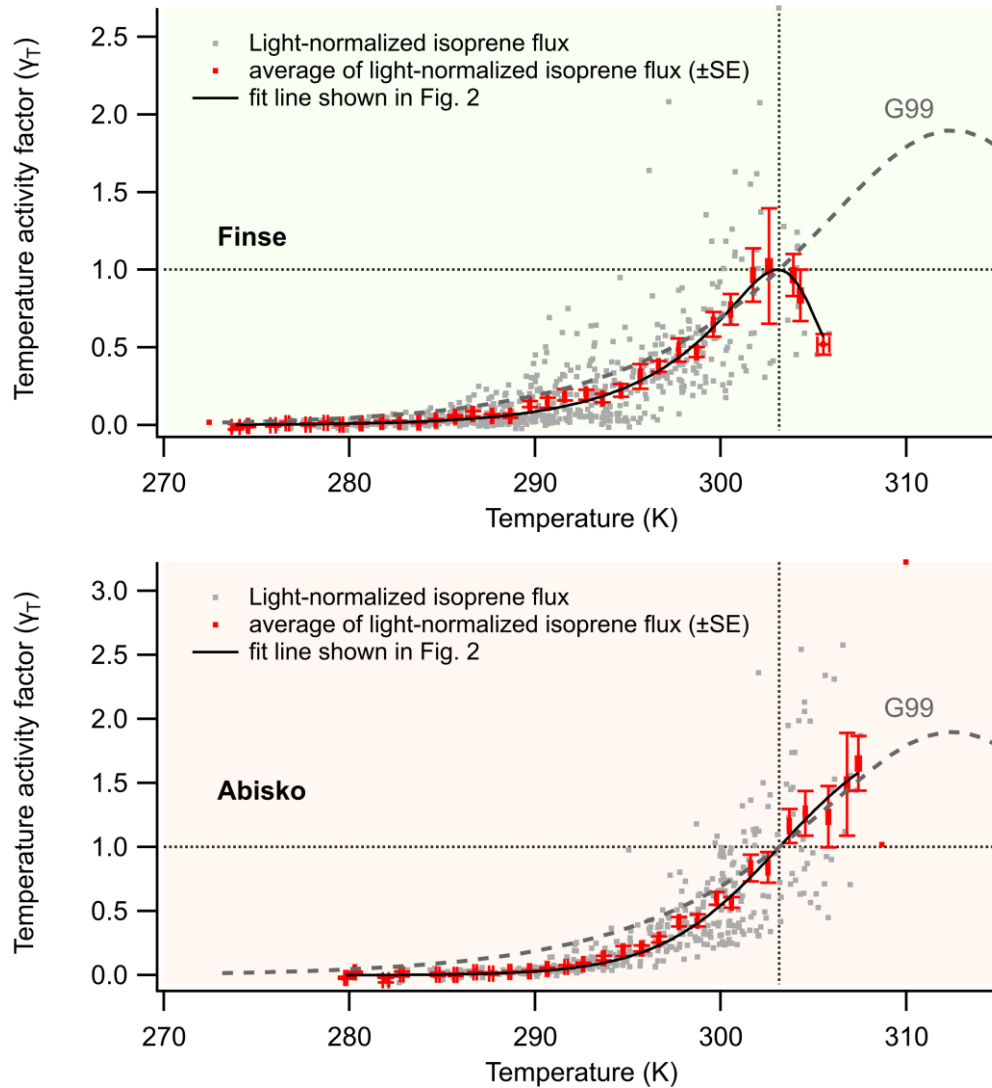

**Fig. S2.** To remove the possible influence of light on the temperature response of isoprene fluxes, we normalized our measured fluxes by dividing them by  $\gamma_P$ , the light activity factor embedded in MEGANv2.1. Because isoprene features a completely light-dependent emission (i.e., light-dependent fraction of emissions, LDF=1), we calculated  $\gamma_P$  by solving Equations 4-6 in Guenther et al. (2012) with our measured PPFD data and using the default “standard conditions for sun leaves” ( $P_s = 200 \mu\text{mol m}^{-2} \text{s}^{-1}$ ). These equations calculate  $\gamma_P$  taking into account not only the instantaneous light conditions, but also the light conditions of the past 1 and 10 days.

We treated the flux data normalized by  $\gamma_P$  just as we treated our original, non-normalized data: taking only the data points with PPFD above  $1000 \mu\text{mol m}^{-2} \text{s}^{-1}$  and normalizing their value so that it equaled 1 at  $30^\circ\text{C}$  ( $303.15 \text{ K}$ ), obtaining the equivalent to temperature activity factors ( $\gamma_T$ ). Then we calculated their temperature response curve as shown in Fig. 2 of the main text for our original data. The resulting graphs are shown here (Finse on top, Abisko below).

The flux data points normalized by  $\gamma_P$  are shown in grey and their 1-K bin averages ( $\pm\text{SE}$ ) are shown in red. The G99 curve is shown as a grey dashed line. Interestingly, the solid black line is the fit to the binned averages of the original data exactly as is shown in Fig. 2 of the main text. That is, the temperature response of the data normalized by  $\gamma_P$  is virtually indistinguishable from that of the original data (non-normalized by  $\gamma_P$ ). Thus, removing the influence of light with the available knowledge about the isoprene light response generates almost the same result as just taking the original data. This clearly demonstrates that our temperature response analysis was not affected by light.

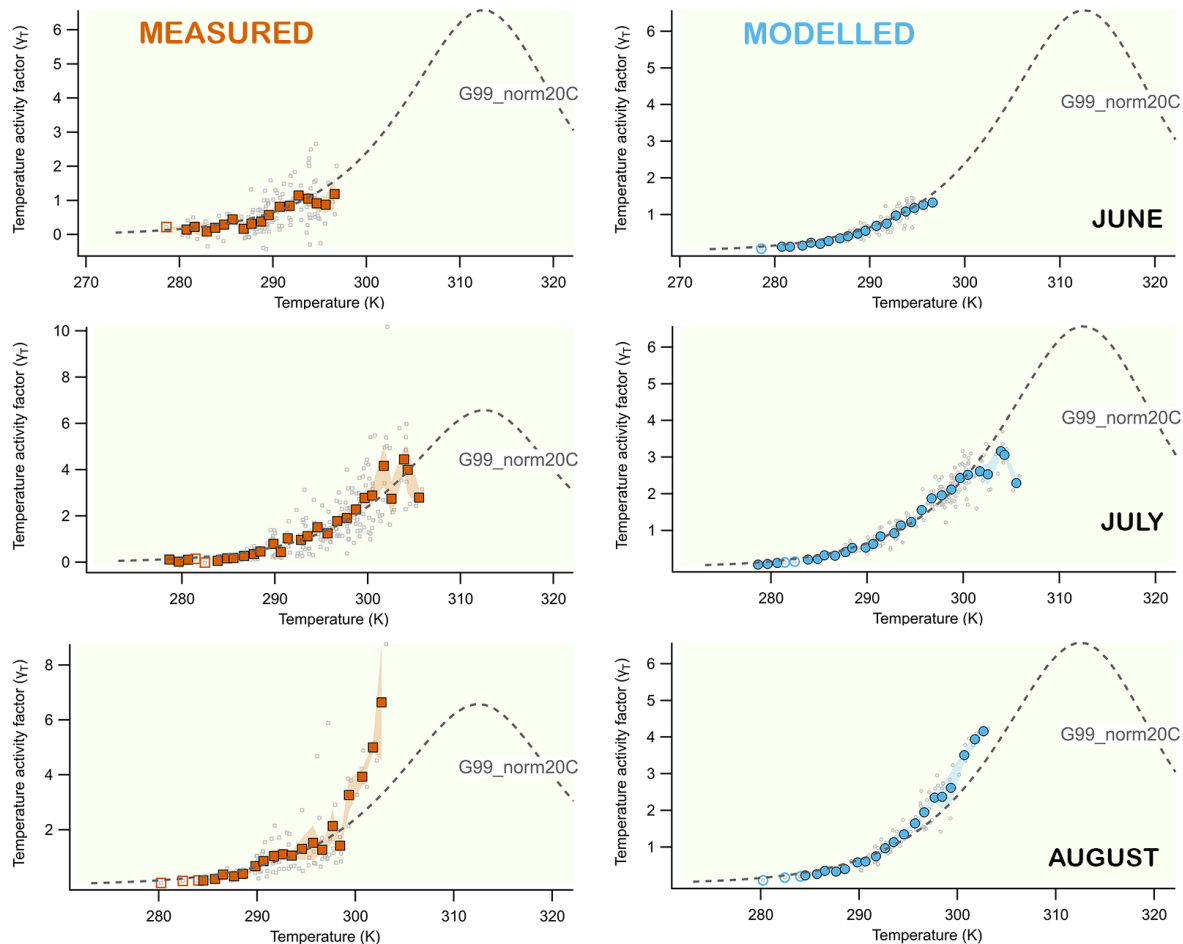

**Fig. S3.** Temperature response of isoprene emissions in different months in Finse. To investigate the possible influence of phenology on the temperature response, we calculated the temperature response for each of the central months of the campaign (June, top; July, middle; August, bottom) and separately for the measured (left-hand panels) and modelled (right-hand panels) fluxes. Due to the lack of data points at 30 °C (=303.15 K) in some months, here the emissions were normalized to equal 1 at 20 °C (=293.15 K), as was the G99 response curve. The symbols depict the same as in Fig. 2 in the main manuscript. The small grey open symbols depict the individual temperature activity factors derived from the individual 30-min fluxes ( $n=156, 216, \text{ and } 127$  for June, July, and August, respectively) that passed the eddy covariance quality criteria and were not limited by available sunlight ( $\text{PPFD} \geq 1,000 \mu\text{mol m}^{-2} \text{s}^{-1}$ ). Note that only MEGAN simulated fluxes that corresponded with an available measured flux, and vice versa, were used in this comparison. The bigger, closed colored symbols represent the averages of the 1 K bins and their shading represents their standard error. We did not fit Eq. 1 to these data because the algorithm is not well suited to the data normalized at 20 °C. Note that the vertical axis has different ranges in each subplot.

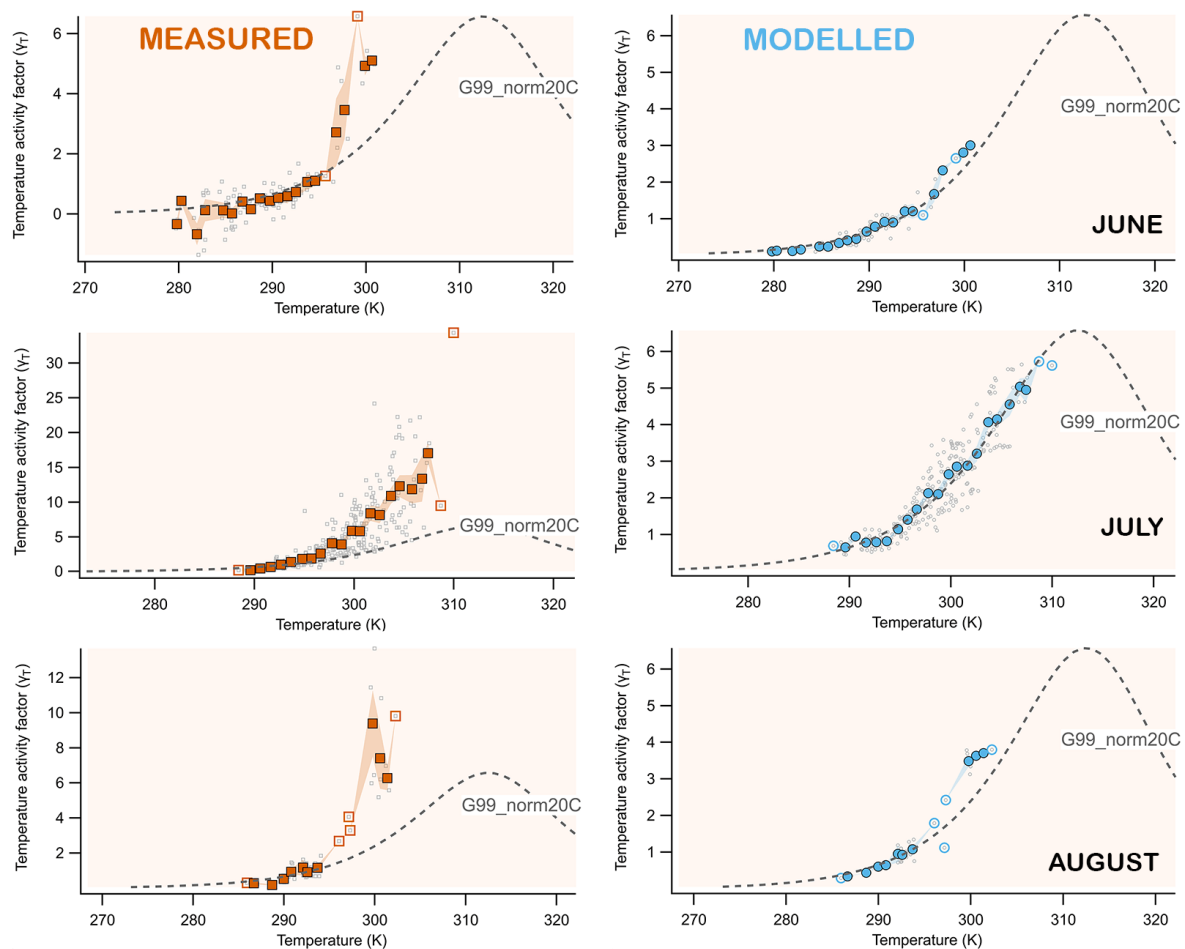

**Fig. S4.** Temperature response of isoprene emissions in different months in Abisko, normalized to equal 1 at 20 °C (=293.15 K). The number of valid individual 30-min fluxes were  $n=108$ , 268, and 48 for June, July, and August, respectively. See the caption of Fig. S3 for further details.

**Table S1.** Isoprene emission factors (EF, expressed as averages in  $\mu\text{g m}^{-2} \text{h}^{-1} \pm 95\%$  confidence intervals) for MEGANv2.1 calculated from the observed ecosystem-level fluxes and the MEGAN activity factors (see Methods for details) using data points measured when PPFD was at least  $1000 \mu\text{mol m}^{-2} \text{s}^{-1}$ . The number of data points (N) used to calculate each average EF is shown next to the EF.

| PPFD $\geq$<br>1000 $\mu\text{mol m}^{-2} \text{s}^{-1}$ | Finse                       |     | Abisko                      |     |
|----------------------------------------------------------|-----------------------------|-----|-----------------------------|-----|
|                                                          | Average EF ( $\pm 95\%$ CI) | N   | Average EF ( $\pm 95\%$ CI) | N   |
| All season                                               | 1959 ( $\pm 139$ )          | 554 | 1212 ( $\pm 76$ )           | 414 |
| May                                                      | 1283 ( $\pm 353$ )          | 55  | -                           | -   |
| June                                                     | 606 ( $\pm 66$ )            | 142 | 743 ( $\pm 138$ )           | 90  |
| July                                                     | 1987 ( $\pm 135$ )          | 212 | 1438 ( $\pm 94$ )           | 268 |
| August                                                   | 3712 ( $\pm 357$ )          | 127 | 928 ( $\pm 155$ )           | 48  |
| September                                                | 2003 ( $\pm 488$ )          | 18  | 628 ( $\pm 214$ )           | 8   |

**Table S2.** Isoprene emission factors (EF, expressed as averages in  $\mu\text{g m}^{-2} \text{h}^{-1} \pm 95\%$  confidence intervals) for MEGANv2.1 calculated from the observed ecosystem-level fluxes and the MEGAN activity factors (see Methods for details) using data points measured when PPFD was at least  $400 \mu\text{mol m}^{-2} \text{s}^{-1}$ . The number of data points (N) used to calculate each average EF is shown next to the EF.

| PPFD $\geq$<br>400 $\mu\text{mol m}^{-2} \text{s}^{-1}$ | Finse                       |      | Abisko                      |      |
|---------------------------------------------------------|-----------------------------|------|-----------------------------|------|
|                                                         | Average EF ( $\pm 95\%$ CI) | N    | Average EF ( $\pm 95\%$ CI) | N    |
| All season                                              | 2009 ( $\pm 108$ )          | 1211 | 1362 ( $\pm 74$ )           | 1286 |
| May                                                     | 1715 ( $\pm 559$ )          | 97   | -                           | -    |
| June                                                    | 649 ( $\pm 58$ )            | 266  | 1413 ( $\pm 206$ )          | 303  |
| July                                                    | 1759 ( $\pm 116$ )          | 422  | 1500 ( $\pm 74$ )           | 567  |
| August                                                  | 3174 ( $\pm 196$ )          | 318  | 1082 ( $\pm 73$ )           | 270  |
| September                                               | 3170 ( $\pm 578$ )          | 108  | 1077 ( $\pm 365$ )          | 140  |

## SI REFERENCES

- Guenther, A.B., Jiang, X., Heald, C.L., Sakulyanontvittaya, T., Duhl, T., Emmons, L.K., Wang, X., 2012. The Model of Emissions of Gases and Aerosols from Nature version 2.1 (MEGAN2.1): an extended and updated framework for modeling biogenic emissions. *Geosci. Model Dev.* 5, 1471–1492. <https://doi.org/10.5194/gmd-5-1471-2012>
- Seco, R., Holst, T., Matzen, M.S., Westergaard-Nielsen, A., Li, T., Simin, T., Jansen, J., Crill, P., Friborg, T., Rinne, J., Rinnan, R., 2020. Volatile organic compound fluxes in a subarctic peatland and lake. *Atmos. Chem. Phys.* 20, 13399–13416. <https://doi.org/10.5194/acp-20-13399-2020>
